# Supplementary material for: Investigating the Aging Effects of Biochar on Soil C and Si Dissolution and the Interactive Impact on Copper Immobilization
Source: MDPI journal article supplement (doi:10.3390/molecules25184319), 2020-09-21
Supplement: s1 [file s1]

# Investigating the Aging Effects of Biochar on Soil C and Si Dissolution and the Interactive Impact on Copper Immobilization

Shaojun Jiang <sup>1,2</sup>, Jiachen Wu <sup>1</sup>, Lianxin Duan <sup>1,2</sup>, Sheng Cheng <sup>1,2</sup>, Jian Huang <sup>1,2</sup> and Tao Chen <sup>1,2,\*</sup>

<sup>1</sup> School of the Environment, South China Normal University, Guangzhou 510006, China: shaojunj93@163.com (S.J.); 15261826395@163.com (J.W.); duanlianxin1993@163.com (L.D.); ShengC@m.scnu.edu.cn (S.C.); 18371807641@163.com (J.H.)

<sup>2</sup> Guangdong Provincial Key Laboratory of Chemical Pollution and Environmental Safety & MOE Key Laboratory of Theoretical Chemistry of Environment, South China Normal University, Guangzhou 510006, China

\* Correspondence: tao.chen@m.scnu.edu.cn; Tel./Fax: +86-20-39310187

## Table and Figure captions:

1. *Table S1 The properties of the soil and BC*
2. *Table S2 Elemental compositions and atomic ratios of biochars*
3. *Table S3 Extractants used in sequential extraction of metal in soil*
4. *Table S4 Comparison of sorption capacity of Cu with biochars derived from different materials*
5. *Table S5 Effects of the application of BC on an increase/decrease in silicon content/DOC content in soil.*
6. *Fig.S1 The locations of the soil sampling sites.*

**Table S1.** The properties of the soil and BC.

| Parameters                                  | Soil  |       |       | BC    |        |
|---------------------------------------------|-------|-------|-------|-------|--------|
|                                             | BS    | VS    | RS    | BC300 | BC600  |
| pH                                          | 6.15  | 5.88  | 4.86  | 7.54  | 9.53   |
| Soil organic matter (g/kg)                  | 34.2  | 16.7  | 9.2   | -     | -      |
| Cation exchange capacity (cmol/kg)          | 48.3  | 20.9  | 14.2  | 18.67 | 26.25  |
| Dissolved organic carbon (mg/kg)            | 121   | 199   | 7.1   | 738   | 257    |
| Available silicon (1:25 citric acid, mg/kg) | 715   | 36    | 105   | -     | -      |
| SiO <sub>2</sub> (%)                        | -     | -     | -     | 4.70  | 8.54   |
| Ash (%)                                     | -     | -     | -     | 4.88  | 9.50   |
| S <sub>BET</sub> (m <sup>2</sup> /g)        | -     | -     | -     | 69.62 | 183.15 |
| PZC                                         | -     | -     | -     | 4.06  | 5.10   |
| Metal content (mg/kg) Cu                    | 61.1  | 19.0  | 8.12  | 2.12  | 3.78   |
| Pb                                          | 8.13  | 16.1  | 7.78  | -     | -      |
| Cd                                          | < 0.1 | < 0.1 | < 0.1 | -     | -      |
| Zn                                          | 83.2  | 45.1  | 16.7  | -     | -      |

BS, black soil. VS, Vegetable garden soil. RS, red soil.

**Table S2.** Elemental compositions and atomic ratios of biochars.

| Biochar | C/%   | H/%  | O/%   | N/%  | H/C  | O/C  | (O+N)/C |
|---------|-------|------|-------|------|------|------|---------|
| BC300   | 57.13 | 3.95 | 22.36 | 2.46 | 0.07 | 0.39 | 0.43    |
| BC600   | 74.57 | 1.51 | 13.91 | 3.19 | 0.02 | 0.19 | 0.23    |

**Table S3.** Extractants used in sequential extraction of metal in soil.

|                 | Phase                    | Reagent                                                                                                                                          | Time of shaking         |
|-----------------|--------------------------|--------------------------------------------------------------------------------------------------------------------------------------------------|-------------------------|
| Fraction 1 (F1) | Easily exchangeable      | 1M MgCl <sub>2</sub> (pH 7)                                                                                                                      | 1 h at 25°C             |
| Fraction 2 (F2) | Bound to carbonates      | 1M CH <sub>3</sub> COONa/CH <sub>3</sub> COOH (pH 5)                                                                                             | 5 h at 25°C             |
| Fraction 3 (F3) | Bound to Fe and Mn oxide | 0.04 M NH <sub>2</sub> OH·HCl in 25%(v/v)CH <sub>3</sub> COOH(pH 2)                                                                              | 6 h at 96°C             |
| Fraction 4 (F4) | Bound to organic         | 30% H <sub>2</sub> O <sub>2</sub> /0.02 MHNO <sub>3</sub> (pH 2), followed by 3.2M CH <sub>3</sub> COONH <sub>4</sub> /20%(v/v) HNO <sub>3</sub> | 2 h at 85°C/3 h at 85°C |
| Fraction 5 (F5) | Residual                 | HNO <sub>3</sub> /HCl/HClO <sub>4</sub>                                                                                                          | Digestion               |

**Table S4.** Comparison of sorption capacity of Cu with biochars derived from different materials.

| Heavy metal | Biochar reparation source | Maximal adsorption capacity (mg/g) | Literature resources     |
|-------------|---------------------------|------------------------------------|--------------------------|
| Cu          | Hardwood                  | 6.79                               | Chen et al.( 2008)       |
|             | Cron straw                | 12.52                              | Chen et al. (2011)       |
|             | Interweed                 | 48.49                              | Li et al. (2013).        |
|             | Miscanthus                | 15.4                               | SHIM et al.(2015)        |
|             | Cow dung                  | 54.4                               | Xu et al. (2013)         |
|             | Pig manure                | 88.23                              | Kolodynska et al.( 2012) |
|             | sludge                    | 14.83                              | Jin et al.(2016)         |
|             | Pine                      | 1.47                               | Jiang et al.(2016)       |
|             | Hickory wood              | 12.30                              | Wang et al.(2015)        |
|             | Apple tree branch         | 15.85                              | Wang et al.(2017)        |
|             | Sycamore wood             | 17.44                              | Wang et al.(2017)        |

## References:

1. Baoliang, C., Dandan, Z., Lizhong, Z., & Xueyou, S. (2008). Sorption characteristics and mechanisms of organic contaminant to carbonaceous biosorbents in aqueous solution. *Science China Chemistry*, 051(005), 464-472.
2. Chen, X. , Chen, G. , Chen, L. , Chen, Y. , Lehmann, J. , & McBride, M. B. , et al. (2011). Adsorption of copper and zinc by biochars produced from pyrolysis of hardwood and corn straw in aqueous solution. *Bioresource Technology*, 102(19), 8877-8884.

3. Li, M. , Liu, Q. , Guo, L. , Zhang, Y. , Lou, Z. , & Wang, Y. , et al. (2013). Cu(ii) removal from aqueous solution by spartina alterniflora derived biochar. *Bioresource Technology*, 141, 83-88.
4. SHIM T, YOO J, RYU C, et al. (2015). Effect of steam activation of biochar produced from a giant Miscanthus on copper sorption and toxicity[J]. *Bioresource Technology*, 197: 85-90.
5. XU X Y, CAO X D, ZHAO L, et al.(2013). Removal of Cu, Zn and Cd from aqueous solutions by the dairy manure-derived biochar[J]. *Environmental Science and Pollution Research*, 20( 1): 358-368.
6. KOŁODYŃSKA D, WNEŹTRZAK R. LEAHY J J, et al. (2012). Kinetic and adsorptive characterization of biochar in metal ions removal. *Chemical Engineering Journal*, 197: 295-305.
7. JIN H M, HANIF M U, CAPAREDA S, et al. (2016).Copper(II) removal potential from aqueous solution by pyrolysis biochar derived from anaerobically digested algae-dairy-manure and effect of KOH activation. *Journal of Environmental Chemical Engineering*, 2016, 4(1): 365-372 .
8. JIANG S S, HUANG L B, NGUYEN T A H, et al.( 2016). Copper and zinc adsorption by softwood and hardwood biochars under elevated sulphate-induced salinity and acidic pH conditions[J]. *Chemosphere*, 142: 64-71 .
9. WANG H Y, GAO B, WANG S, et al . Removal of Pb (II), Cu(II), and Cd(II) from aqueous solutions by biochar derived from KMnO4 treated hickory wood[J]. *Bioresource Technology*, 2015, 197: 356-362.
10. WANG Tong-tong, MA Jiang-bo, QU Dong, et al. (2017) . Characteristics and mechanism of copper adsorption from aqueous solutions on biochar produced from sawdust and apple branch[J].*Environmental Science*, 38(5):2161-2171.

**Table S5.** Effects of the application of BC on an increase/decrease in silicon content/ DOC content in soil.

|                               | Time  | BS    |       | VS    |       | RS    |       |
|-------------------------------|-------|-------|-------|-------|-------|-------|-------|
|                               |       | BC300 | BC600 | BC300 | BC600 | BC300 | BC600 |
| E <sub>BC</sub> -DOC          | 1 d   | 48%   | 20%   | 39%   | 11%   | 634%  | 301%  |
|                               | 3 d   | 27%   | -1%   | 39%   | 18%   | 797%  | 256%  |
|                               | 5 d   | 19%   | -2%   | 49%   | 24%   | 839%  | 225%  |
|                               | 7 d   | 6%    | -11%  | 36%   | 28%   | 613%  | 165%  |
|                               | 14 d  | 20%   | -6%   | 42%   | 32%   | 678%  | 292%  |
|                               | 21 d  | 16%   | -8%   | 62%   | 40%   | 938%  | 204%  |
|                               | 28 d  | 13%   | -5%   | 65%   | 45%   | 629%  | 122%  |
|                               | 60 d  | 20%   | 4%    | 46%   | 32%   | 590%  | 121%  |
|                               | 180 d | 14%   | 2%    | 48%   | 25%   | 475%  | 127%  |
|                               | 1 a   | 20%   | 7%    | 23%   | 15%   | 513%  | 139%  |
| E <sub>BC</sub> -Available Si | 1 d   | -10%  | 1%    | -30%  | 228%  | -16%  | 94%   |
|                               | 3 d   | -9%   | 2%    | -42%  | 108%  | -6%   | 81%   |
|                               | 5 d   | -8%   | 1%    | -30%  | 149%  | -13%  | 73%   |
|                               | 7 d   | -7%   | -3%   | -30%  | 87%   | -20%  | 53%   |
|                               | 14 d  | -11%  | -4%   | -13%  | 136%  | -18%  | 49%   |
|                               | 21 d  | -14%  | -6%   | -9%   | 190%  | -25%  | 48%   |
|                               | 28 d  | -13%  | -1%   | -15%  | 123%  | -35%  | 46%   |
|                               | 60 d  | -13%  | 2%    | -17%  | 225%  | -35%  | 46%   |
|                               | 180 d | -10%  | 3%    | -31%  | 174%  | -13%  | 52%   |
|                               | 1 a   | -11%  | 1%    | -13%  | 199%  | -13%  | 66%   |

BS, black soil.VS, Vegetable garden soil. RS,red soil; E<sub>BC</sub>-DOC, The percent increase or decrease in DOC content in soil under amendment with BC; E<sub>BC</sub>-Available Si, The percent increase or decrease in available Si content in soil under amendment with BC

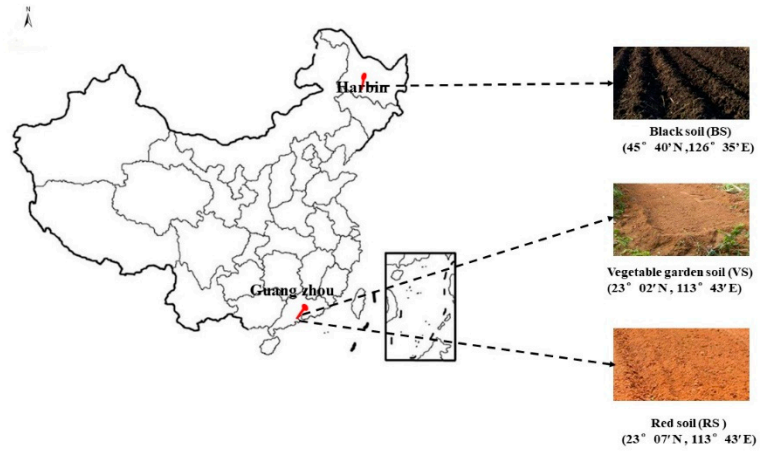

**Figure S1.** The locations of the soil sampling sites.
